# Supplementary material for: Risk of Psychosis in Recurrent Episodes of Psychotic and Nonpsychotic Major Depressive Disorder: A Systematic Review and Meta-Analysis
Source: Atypon-hosted journal article supplement (doi:10.1176/appi.ajp.2018.17101138), 2018-05-24
Supplement: appi.ajp.2018.17101138.ds001.pdf [file appi.ajp.2018.17101138.ds001.pdf]

**TABLE S1. Studies of the course of psychotic depression that were excluded**

| Study                                        | Reason for exclusion                                         |
|----------------------------------------------|--------------------------------------------------------------|
| Helms PM and Smith RE. 1983 <sup>17</sup>    | No non-psychotic comparison group                            |
| Aronson TA, et al. 1988 <sup>18</sup>        | No non-psychotic comparison group                            |
| Frangos E, et al. 1983 <sup>19</sup>         | No non-psychotic comparison group                            |
| Goldberg JF, and Harrow M 2004 <sup>20</sup> | Concordance data reported but actual numbers not available   |
| Kettering RL et al. 1987 <sup>21</sup>       | Not new episodes                                             |
| Kessing LV. 2008 <sup>22</sup>               | Tracked group data, not course within subjects               |
| Thakur M, et al. 1999 <sup>23</sup>          | Included bipolar patients                                    |
| Leyton M et al. 1995 <sup>24</sup>           | Diagnosed patients as psychotic if any episode was psychotic |
| Parker G, et al. 1991 <sup>25</sup>          | Diagnosis from an informal interview                         |

**FIGURE S1. Meta-Analysis of Risk of Psychosis in All Episodes in Index Psychotic and Non-Psychotic Subjects; Nested by Retrospective and Prospective Studies**

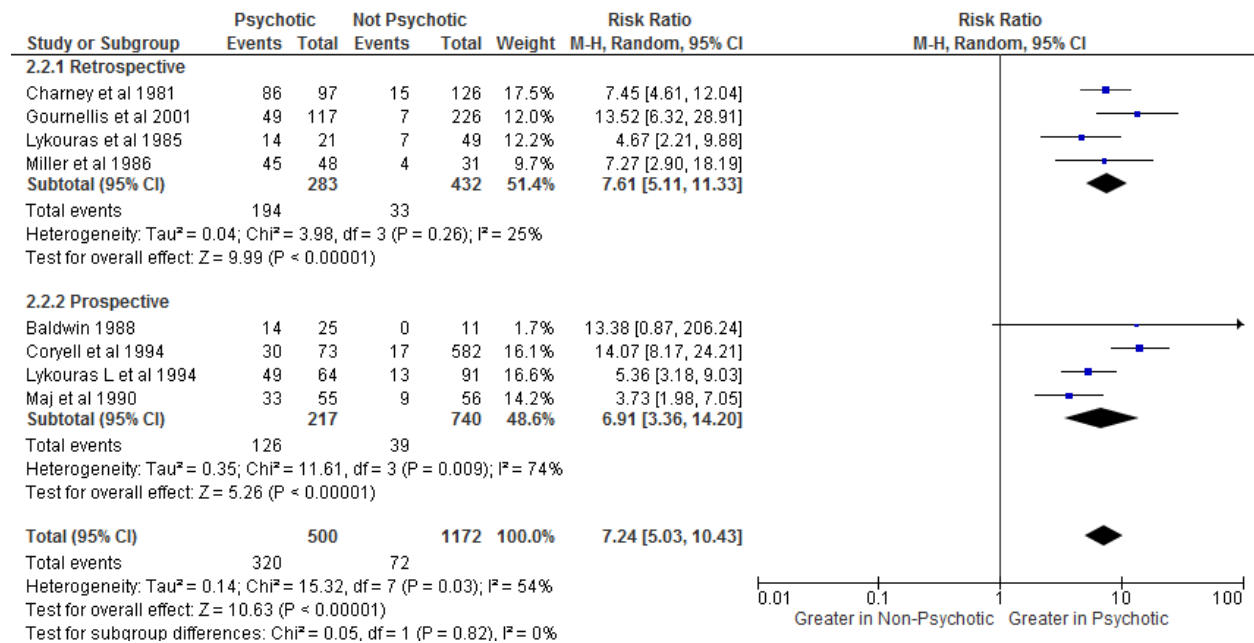

The risk ratios are not significantly different in the two groups, 7.61 vs 6.91,  $X^2 = 0.05$ ,  $p = 0.82$ .

The actual pooled risk of psychosis in all episodes as follows:

|                       | Index Diagnosis      |                          |
|-----------------------|----------------------|--------------------------|
|                       | Psychotic Depression | Non-Psychotic Depression |
| Retrospective studies | 68.6%                | 7.6%                     |
| Prospective studies   | 58.1%                | 5.3%                     |

**FIGURE S2. Meta-Analysis of Risk of Psychosis in All Episodes in Index Psychotic and Non-Psychotic Subjects; nested by date of publication, before 1990 and 1990 or later**

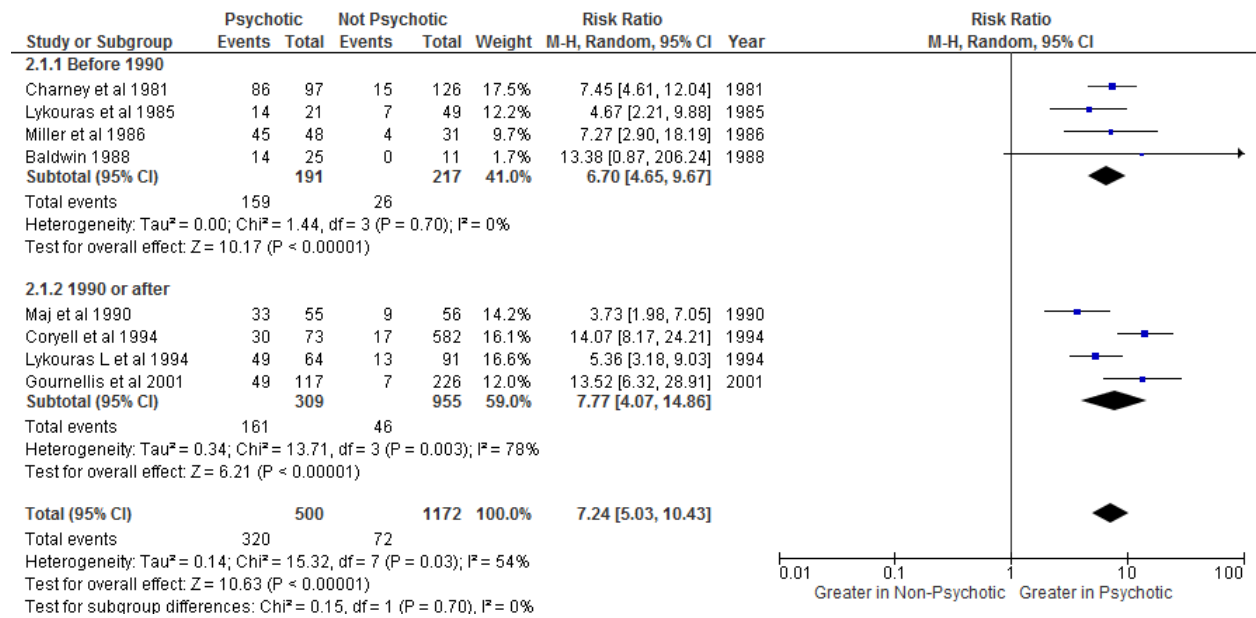

Risk Ratios of 6.70 and 7.77 are not significantly different.

Heterogeneity is low in the early studies, I<sup>2</sup> = 0.

The actual pooled risk of psychosis in all episodes as follows:

|                      | Index Diagnosis      |                          |
|----------------------|----------------------|--------------------------|
|                      | Psychotic Depression | Non-Psychotic Depression |
| Early studies < 1990 | 83.2%                | 12.0%                    |
| Later studies ≥ 1990 | 52.1%                | 4.8%                     |

**FIGURE S3. Meta-Analysis of Risk of Psychosis in All Episodes in Index Psychotic and Non-Psychotic Subjects; nested by studies limited to patients over 60 vs. mixed aged studies**

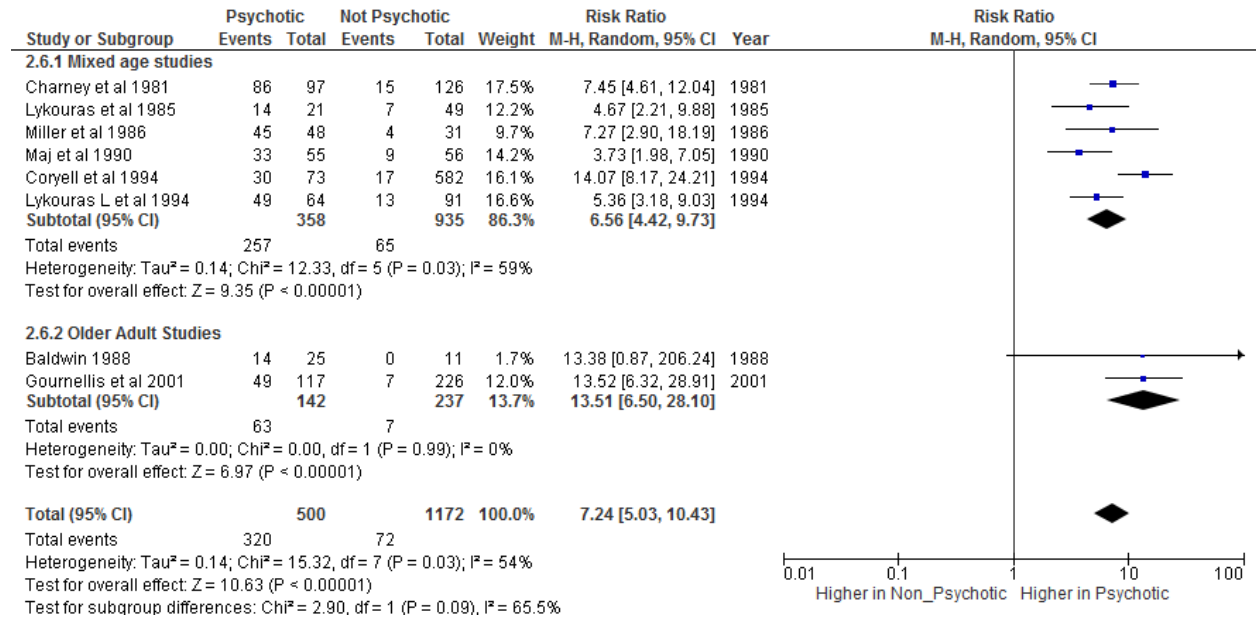

Although the risk ratios for the two subgroups were not significantly different, there was a trend for higher RRs in the older samples. RR = 13.51 vs. 6.56, p=.09. Heterogeneity is low in the older patient studies, I<sup>2</sup> = 0. The higher risk ratio appears related to low rates of psychosis in the non-PD older patients. The actual pooled risk of psychosis in all episodes as follows:

|                   | Index Diagnosis      |                          |
|-------------------|----------------------|--------------------------|
|                   | Psychotic Depression | Non-Psychotic Depression |
| Mixed age studies | 71.8%                | 7.0%                     |
| Over 60 studies   | 44.4%                | 3.0%                     |

**FIGURE S4. Meta-Analysis of Risk of Psychosis in All Episodes in Index Psychotic and Non-Psychotic Subjects; nested by studies limited to mood congruent (MC) PD subjects vs studies including mood congruent and mood incongruent (MI) PD subjects**

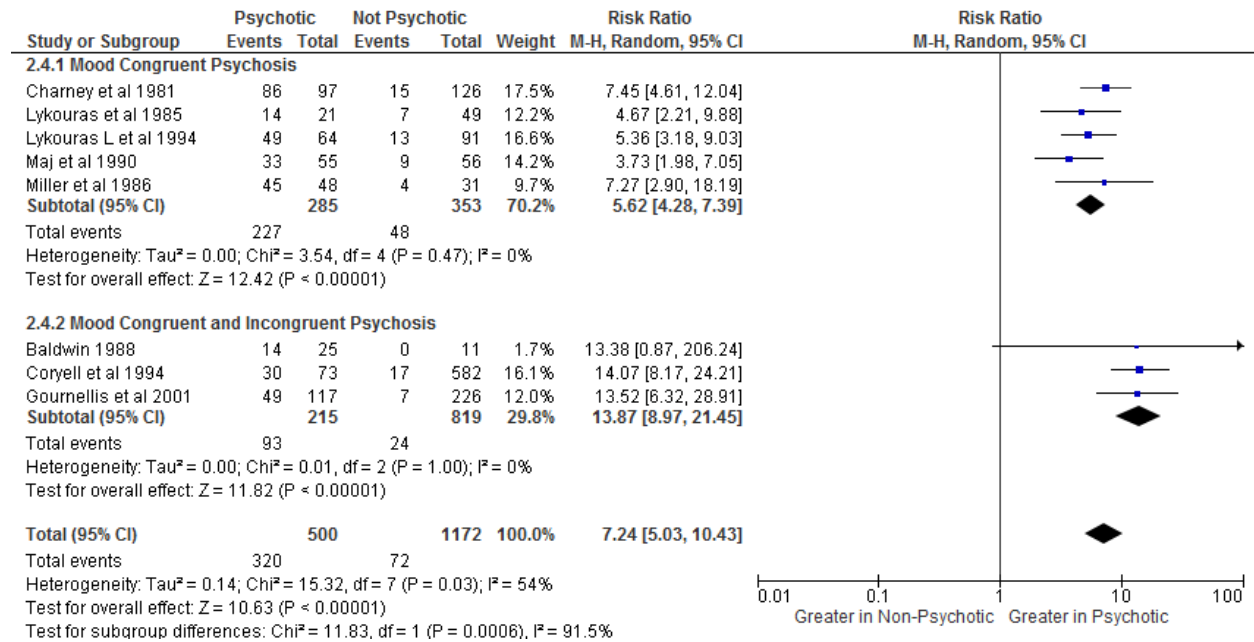

Risk Ratios of 5.62 and 13.87, are significantly different,  $X^2 = 11.83$ ,  $p = 0.0006$ .

Heterogeneity is not significant and  $I^2 = 0\%$  in both the MC and MC+MI subgroups.

The actual pooled risk of psychosis in all episodes as follows:

|                                         | Index Diagnosis      |                          |
|-----------------------------------------|----------------------|--------------------------|
|                                         | Psychotic Depression | Non-Psychotic Depression |
| Mood congruent patients only            | 71.8%                | 7.0%                     |
| Mood congruent and incongruent patients | 44.4%                | 3.0%                     |
